# Supplementary material
Source: MDPI journal article supplement (https://www.mdpi.com/2071-1050/14/1/235)
Supplement: s1 [file s1]

Table S1. Covid-19 Misinformations identified from twitter and agreement with content, 2020. (n=6,843).

| Content                                                                                                                                                                                                     | n    | %*   |
|-------------------------------------------------------------------------------------------------------------------------------------------------------------------------------------------------------------|------|------|
| 1. The new Coronavirus was developed in the laboratory by Chinese scientists who intended to use the virus as a biological weapon.                                                                          | 901  | 13,2 |
| 2. People who have been diagnosed with the new Coronavirus but have no symptoms are not able to transmit the virus to others.                                                                               | 1037 | 15,2 |
| 3. The new coronavirus would have been genetically manipulated and would have a structure similar to that of the HIV virus, which causes AIDS.                                                              | 449  | 6,6  |
| 4. Social isolation can reduce immunity and facilitate infection by the new Coronavirus.                                                                                                                    | 1208 | 17,7 |
| 5. Avocado tea, hibiscus, perfume and whiskey would be some of the substances capable of preventing SARS-CoV-2 infection.                                                                                   | 91   | 1,3  |
| 6. Using alcohol gel is more efficient than washing your hands with soap and water as a preventive measure for the new Coronavirus.                                                                         | 400  | 5,8  |
| 7. Daily use of gel alcohol can be toxic and extremely harmful to health.                                                                                                                                   | 732  | 10,7 |
| 8. The use of face shields to prevent new Coronavirus can cause suffocation and therefore should not be used frequently.                                                                                    | 619  | 8,9  |
| 9. The use of a face protection mask to prevent the new Coronavirus can increase the amount of viruses in the blood, "thicken" the blood and cause thrombosis.                                              | 138  | 2,0  |
| 10. The new Coronavirus can be eliminated from the body through the ingestion of water and gargling with warm water, saline or acid solutions, thus preventing the evolution of the infection.              | 434  | 6,3  |
| 11. Gargling with hot salt water and vinegar can cure the virus, because the virus remains in the throat for only 4 days.                                                                                   | 324  | 4,7  |
| 12. The virus cannot survive temperatures higher than 26 degrees.                                                                                                                                           | 669  | 9,8  |
| 13. Vinegar is better than alcohol to avoid covid-19 contamination.                                                                                                                                         | 173  | 2,5  |
| 14. Autohemotherapy (taking the blood of someone who is infected with covid-19 and then reinjecting it to stimulate the immune system to acquire protection) is very effective against the new Coronavirus. | 226  | 3,3  |
| 15. Very hot fennel tea fights SARS-CoV-2 very efficiently.                                                                                                                                                 | 113  | 1,7  |
| 16. To fight Covid-19, you can improvise the alcohol gel, mixing it with the hair gel. It slows down the virus and it dies faster.                                                                          | 113  | 1,7  |
| 17. The new Coronavirus was spread on purpose by the pharmaceutical industry for population control.                                                                                                        | 414  | 6,0  |

|                                                                                                                                                                        |      |      |
|------------------------------------------------------------------------------------------------------------------------------------------------------------------------|------|------|
| 18. Eating garlic prevents infection with the new Coronavirus.                                                                                                         | 180  | 2,6  |
| 19. Drinking drinking water every 15 minutes expels the new Coronavirus, as it prevents it from going into the lungs.                                                  | 493  | 7,2  |
| 20. Being able to hold your breath for 10 seconds indicates whether the person has Covid-19.                                                                           | 226  | 3,9  |
| 21. The digital thermometer that emits infrared light should not be used in the forehead region, as it can cause brain damage, causing hormonal problems and insomnia. | 1717 | 25,1 |

\* The values do not add up to 100% as someone could agree with more than one question.
